# Supplementary material
Source: MDPI journal article supplement (https://www.mdpi.com/2073-4395/12/1/31)
Supplement: s1 [file s1 › agronomy-1473476-supplementary.pdf]

## Supplementary Information

- Material S1-The procedure to estimate wind speed at 2 m height and radiations
- Material S2-The equation of the Penman method
- Figure S1. Monthly variation of the coefficient of determination ( $R^2$ ) values obtained using the three temperature-based reference evapotranspiration methods and the FAO56-PM method in the 36 agricultural zones.
- Figure S2. Monthly variation of the mean absolute error ( $MAE$ ,  $\text{mm}\cdot\text{day}^{-1}$ ) values obtained using the three temperature-based reference evapotranspiration methods and the FAO56-PM method in the 36 agricultural zones.
- Figure S3. Monthly variation of the root mean square error ( $RMSE$ ,  $\text{mm}\cdot\text{day}^{-1}$ ) values obtained using the three temperature-based reference evapotranspiration methods and the FAO56-PM method in the 36 agricultural zones.
- Figure S4. Monthly variation of the coefficient of determination ( $R^2$ ) values obtained using the five radiation-based reference evapotranspiration methods and the FAO56-PM method in the 36 agricultural zones.
- Figure S5. Monthly variation of the mean absolute error ( $MAE$ ,  $\text{mm}\cdot\text{day}^{-1}$ ) values obtained using the five radiation-based reference evapotranspiration methods and the FAO56-PM method in the 36 agricultural zones.
- Figure S6. Monthly variation of the mean root mean square error ( $RMSE$ ,  $\text{mm}\cdot\text{day}^{-1}$ ) values obtained using the five radiation-based reference evapotranspiration methods and the FAO56-PM method in the 36 agricultural zones.
- Figure S7. Mean absolute error  $MAE$  (a) and root mean square error  $RMSE$  (b) obtained from the daily reference evapotranspiration calculated using the eight calibrated methods versus daily reference evapotranspiration calculated using the FAO56-PM method, the difference between the  $MAE$  (c) and  $RMSE$  (d) from the original methods minus those from the calibrated methods in 36 agricultural zones of China.

### Material S1-The procedure to estimate wind speed at 2 m height and radiations

To adjust wind speed data obtained from instruments placed other than 2 m, wind profile relationship may be used for measurements:

$$u_2 = u_z \frac{4.87}{\ln(67.8z - 5.42)} \quad (S1)$$

where  $u_2$  and  $u_z$ , measured wind speed at 2 m and  $z$  m above ground surface, respectively ( $\text{m}\cdot\text{s}^{-1}$ ),  $z$ , height of measurement above ground surface (m),  $z=10$  in this study.

The radiations are given by:

$$R_a = \frac{24 \times 60}{\pi} \times G_{sc} \times d_r \times [\omega_s \times \sin(\varphi) \times \sin(\delta) + \cos(\varphi) \times \cos(\delta) \times \sin(\omega_s)] \quad (S2)$$

$$R_s = \left( a_s + b_s \frac{n}{N} \right) R_a \quad (S3)$$

$$R_{so} = (a_s + b_s) R_a \quad (S4)$$

$$R_{ns} = (1 - \alpha) R_s \quad (S5)$$

$$R_{nl} = \sigma \left[ \frac{T_{max,K}^4 + T_{min,K}^4}{2} \right] \left( 0.34 - 0.14 \sqrt{e_a} \right) \left( 1.35 \frac{R_s}{R_{so}} - 0.35 \right) \quad (S6)$$

$$R_n = R_{ns} - R_{nl} \quad (S7)$$

where,  $R_a$ , extraterrestrial radiation ( $\text{MJ}\cdot\text{m}^{-2}\cdot\text{day}^{-1}$ );  $R_s$ , solar radiation ( $\text{MJ}\cdot\text{m}^{-2}\cdot\text{day}^{-1}$ );  $R_{so}$ , clear-sky solar radiation ( $\text{MJ}\cdot\text{m}^{-2}\cdot\text{day}^{-1}$ );  $R_{ns}$ , net solar radiation ( $\text{MJ}\cdot\text{m}^{-2}\cdot\text{day}^{-1}$ );  $R_{nl}$ , net outgoing longwave radiation ( $\text{MJ}\cdot\text{m}^{-2}\cdot\text{day}^{-1}$ );  $G_{sc}$ , solar constant ( $0.0820 \text{ MJ}\cdot\text{m}^{-2}\cdot\text{min}^{-1}$ );  $d_r$ , inverse relative distance Earth-Sun;  $\omega_s$ , sunset hour angle (rad);  $\delta$ , solar declination (rad);  $\varphi$ , latitude (rad);  $n$ , actual duration of sunshine;  $N$ , maximum possible duration of sunshine or daylight hours;  $a_s$ , regression constant, expressing the fraction of extraterrestrial radiation reaching the earth on overcast days ( $n = 0$ );  $a_s + b_s$  fraction of extraterrestrial radiation reaching

the earth on clear days ( $n = N$ );  $\alpha$ , albedo (0.23);  $\sigma$ , Stefan-Boltzmann constant ( $4.903 \times 10^{-9}$  MJ·K<sup>-4</sup>·m<sup>-2</sup>·day<sup>-1</sup>);  $T_{max,K}$ , maximum absolute temperature during the 24-hour period (K);  $T_{min,K}$ , minimum absolute temperature during the 24-hour period (K);  $e_a$ , actual vapour pressure (kPa).

### Material S2-The equation of the Penman method

The Penman method for calculating daily potential evapotranspiration can be expressed as:

$$PET = \frac{\Delta(R_n - G) + 6.43\gamma(1 + 0.536u_2)(e_s - e_a)}{(\Delta + \gamma)\lambda} \quad (S8)$$

where PET is the potential evapotranspiration (mm·day<sup>-1</sup>);  $R_n$  is the net radiation at the surface (MJ·m<sup>-2</sup>·day<sup>-1</sup>);  $G$  is the soil heat flux (MJ·m<sup>-2</sup>·day<sup>-1</sup>);  $u_2$  is the wind speed at a height of 2 m (m·s<sup>-1</sup>);  $\Delta$  is the slope of the saturated water vapor pressure curve (kPa·°C<sup>-1</sup>);  $e_s$  is the saturation vapor pressure (kPa);  $e_a$  is the actual vapor pressure (kPa); and  $\lambda$  is the latent heat of evaporation (MJ·kg<sup>-1</sup>):

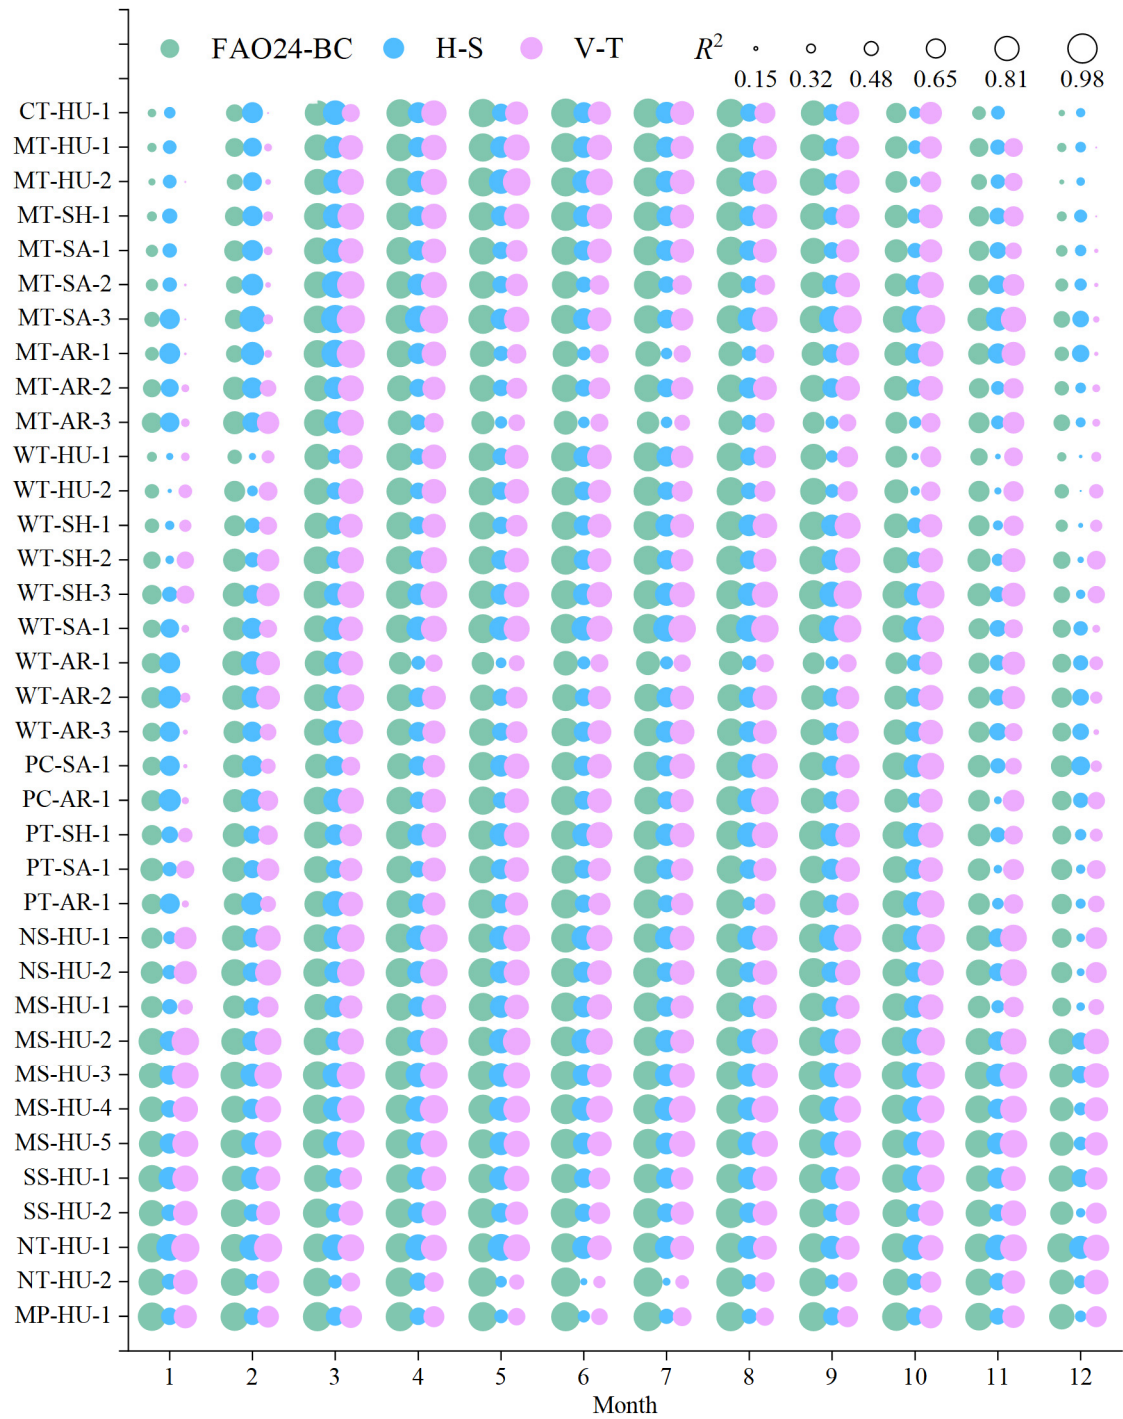

**Figure S1. Monthly variation of the coefficient of determination ( $R^2$ ) values obtained using the three temperature-based reference evapotranspiration methods and the FAO56-PM method in the 36 agricultural zones.**

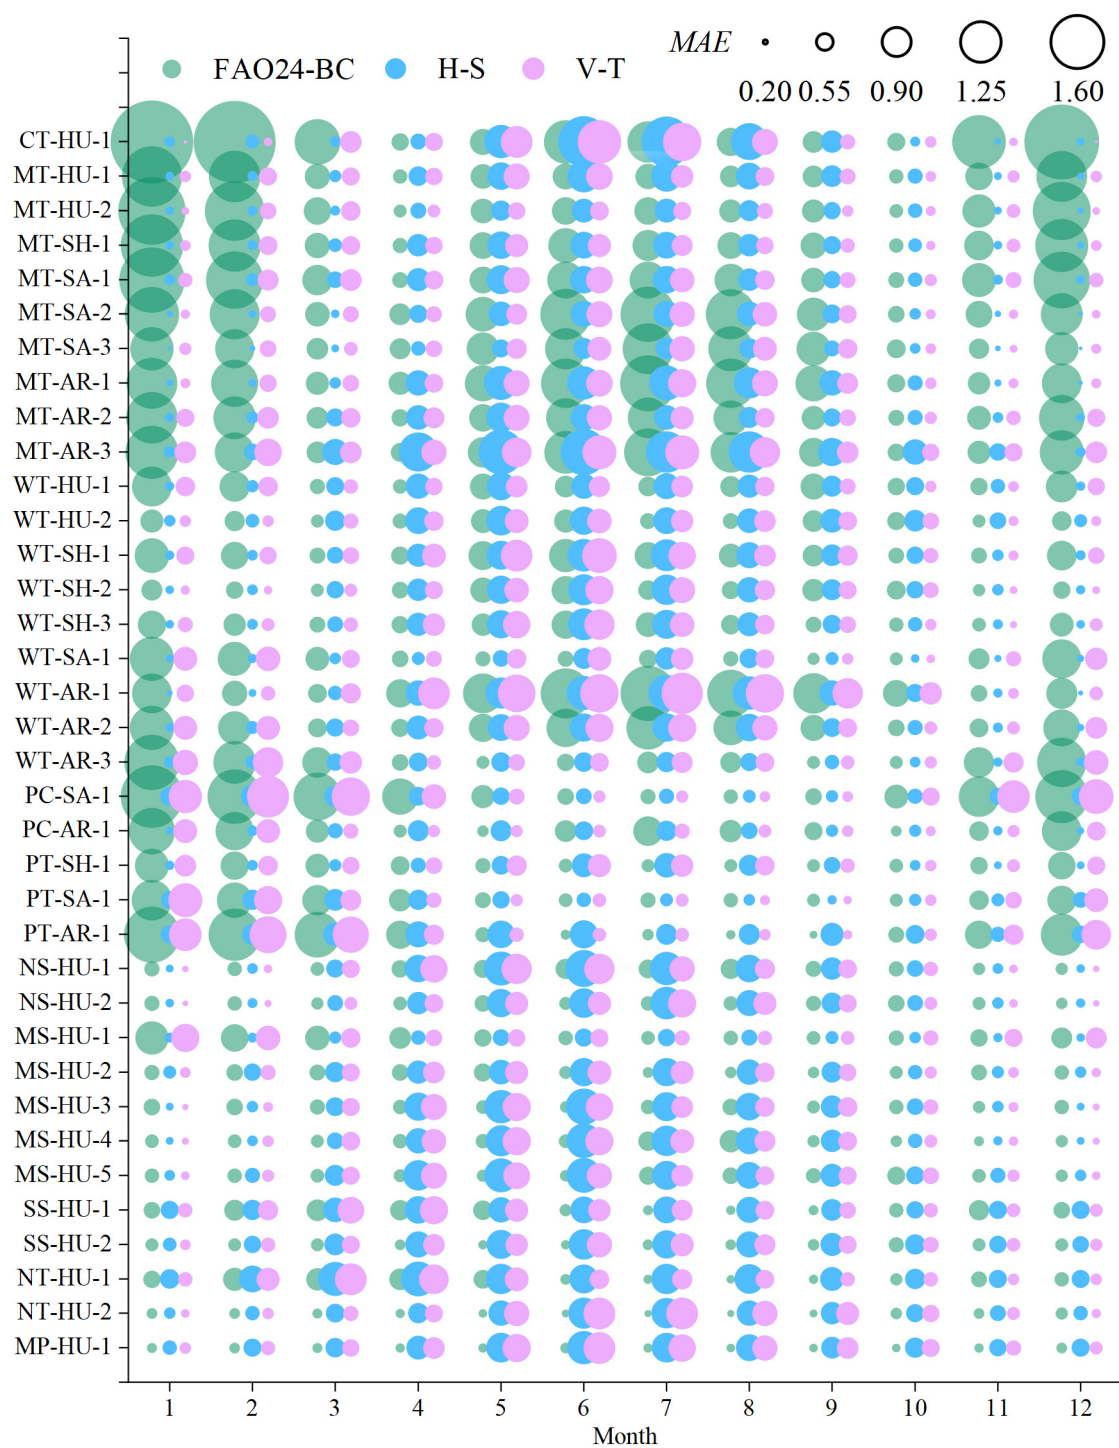

**Figure S2. Monthly variation of the mean absolute error ( $MAE$ ,  $\text{mm}\cdot\text{day}^{-1}$ ) values obtained using the three temperature-based reference evapotranspiration methods and the FAO56-PM method in the 36 agricultural zones.**

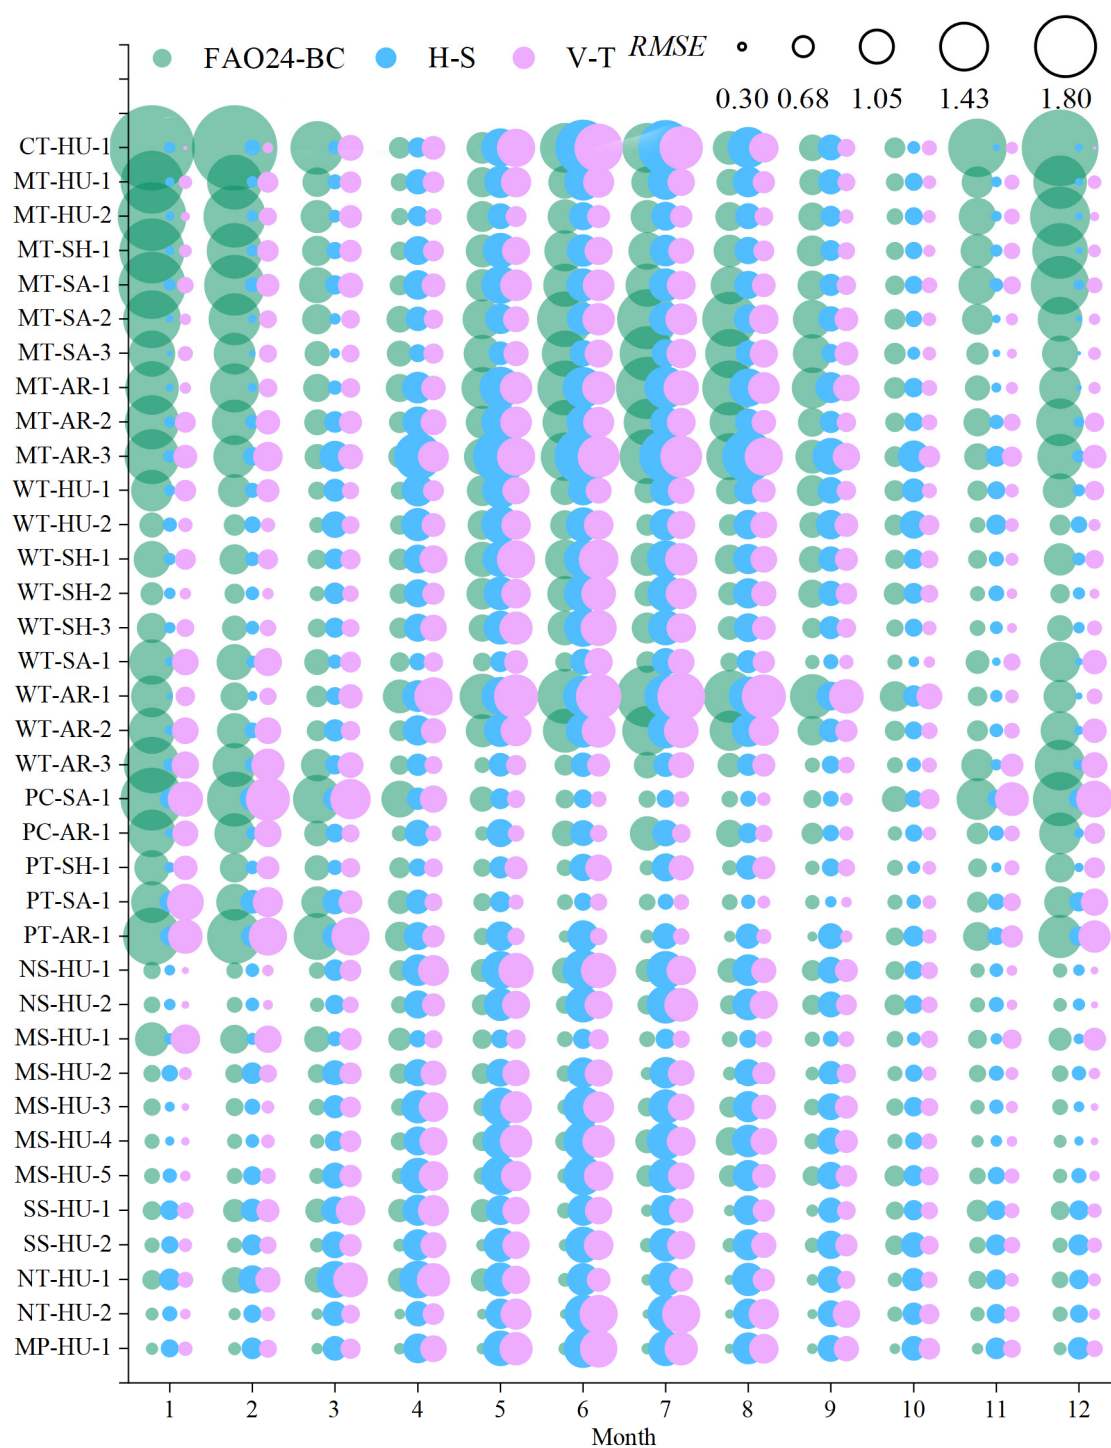

**Figure S3. Monthly variation of the root mean square error ( $RMSE$ , mm-day<sup>-1</sup>) values obtained using the three temperature-based reference evapotranspiration methods and the FAO56-PM method in the 36 agricultural zones.**

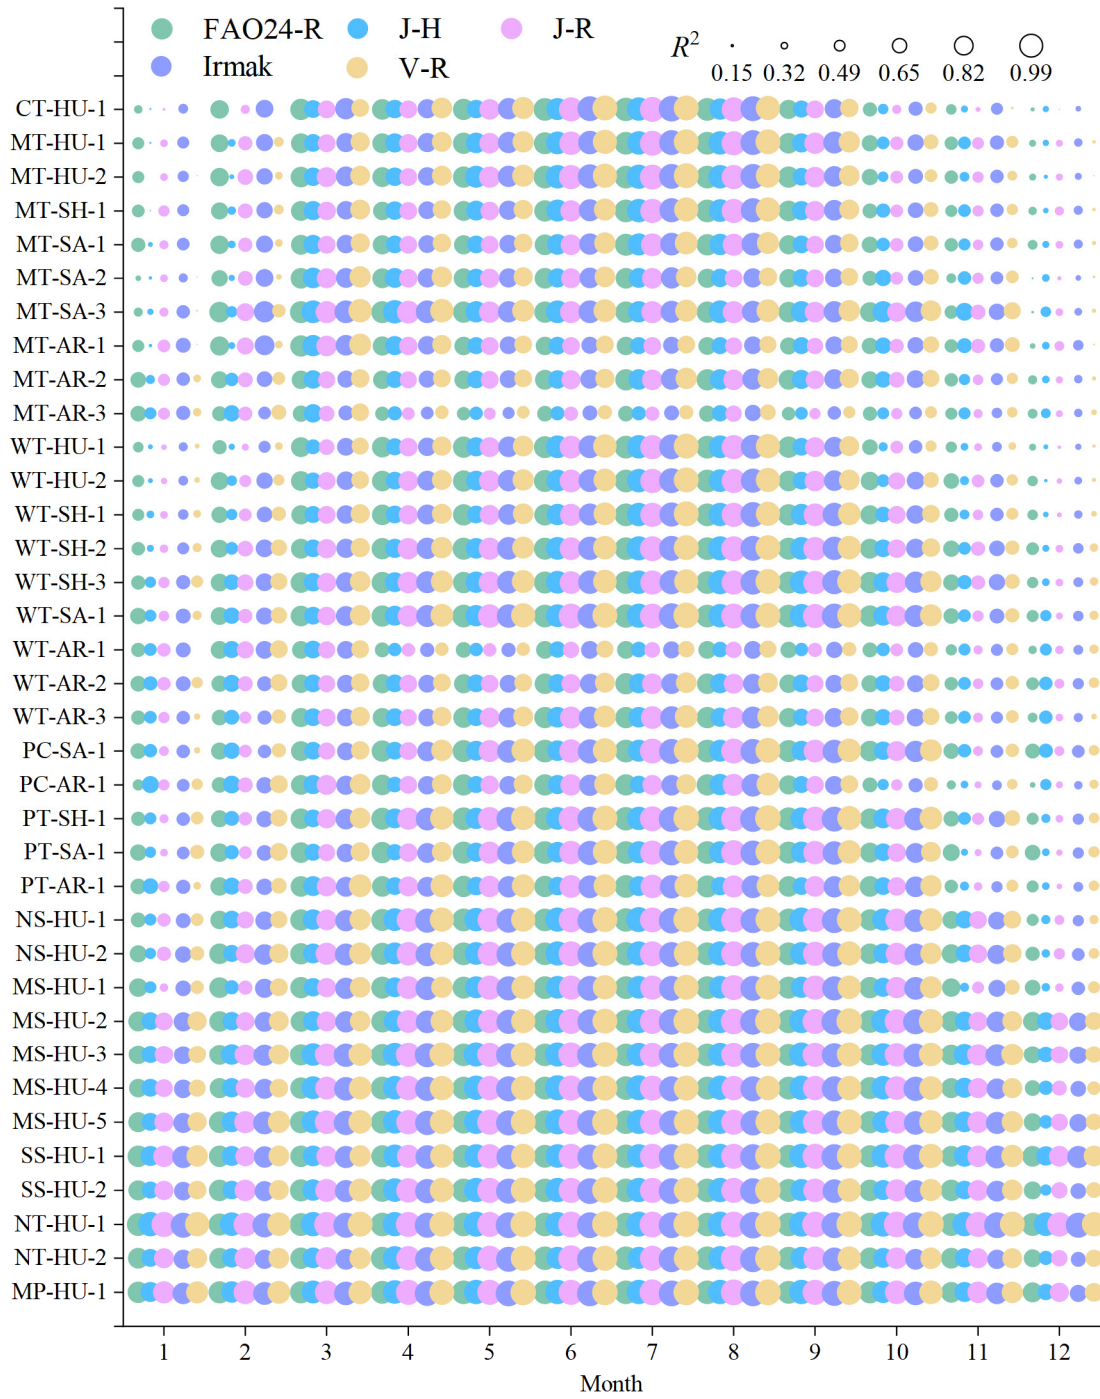

**Figure S4. Monthly variation of the coefficient of determination ( $R^2$ ) values obtained using the five radiation-based reference evapotranspiration methods and the FAO56-PM method in the 36 agricultural zones.**

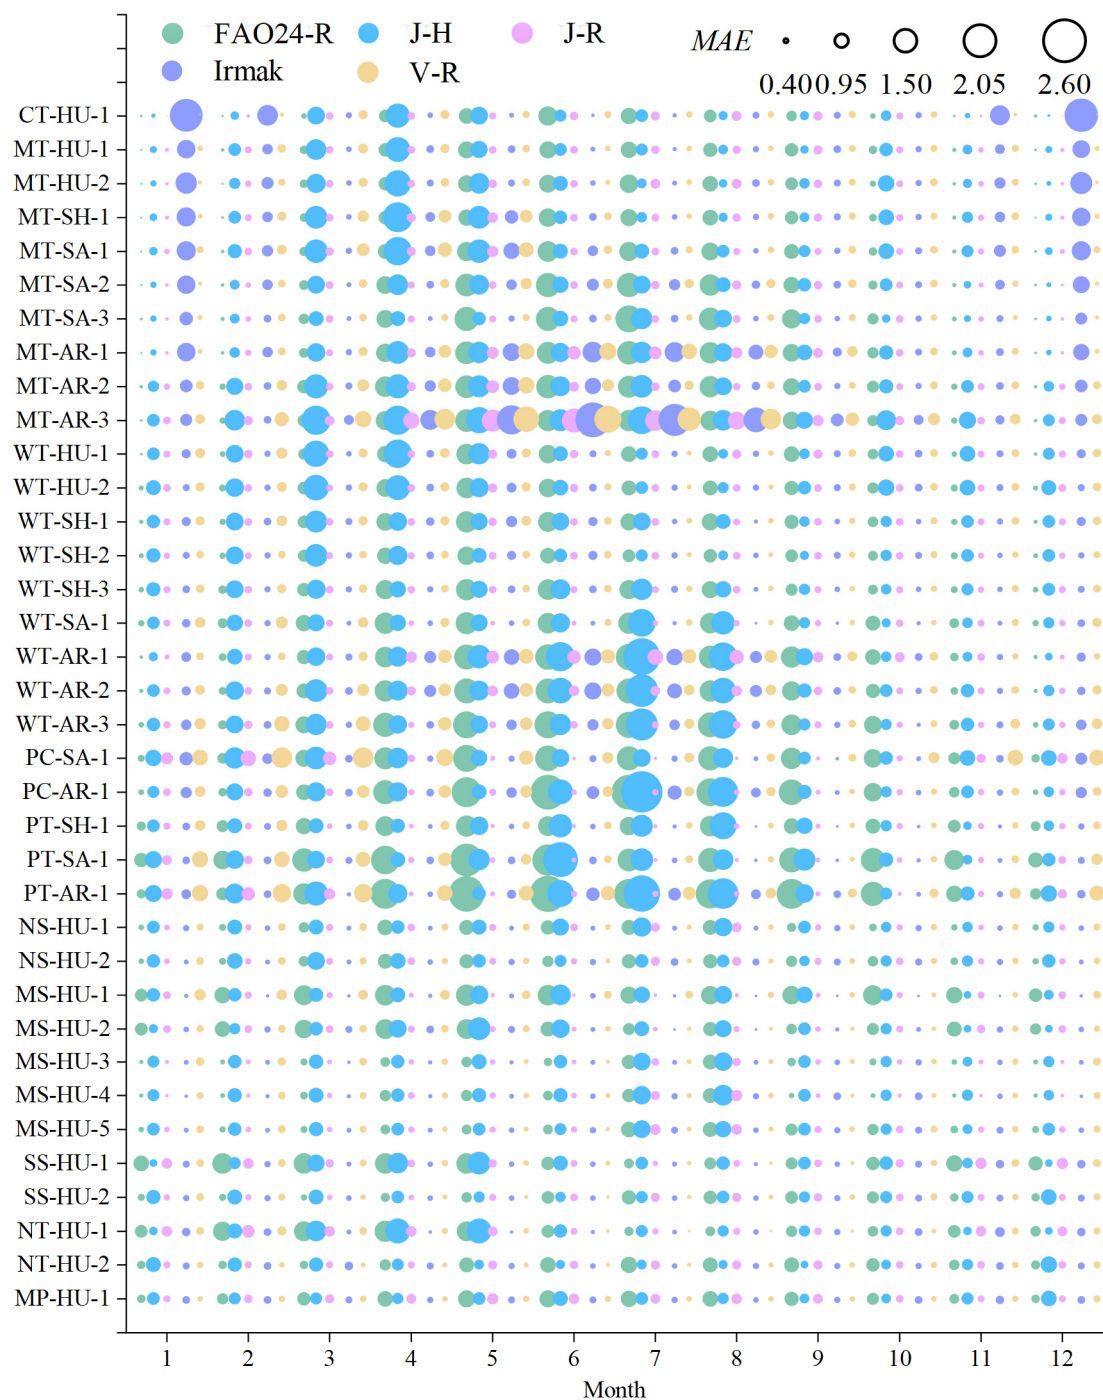

**Figure S5. Monthly variation of the mean absolute error ( $MAE$ ,  $\text{mm}\cdot\text{day}^{-1}$ ) values obtained using the five radiation-based reference evapotranspiration methods and the FAO56-PM method in the 36 agricultural zones.**

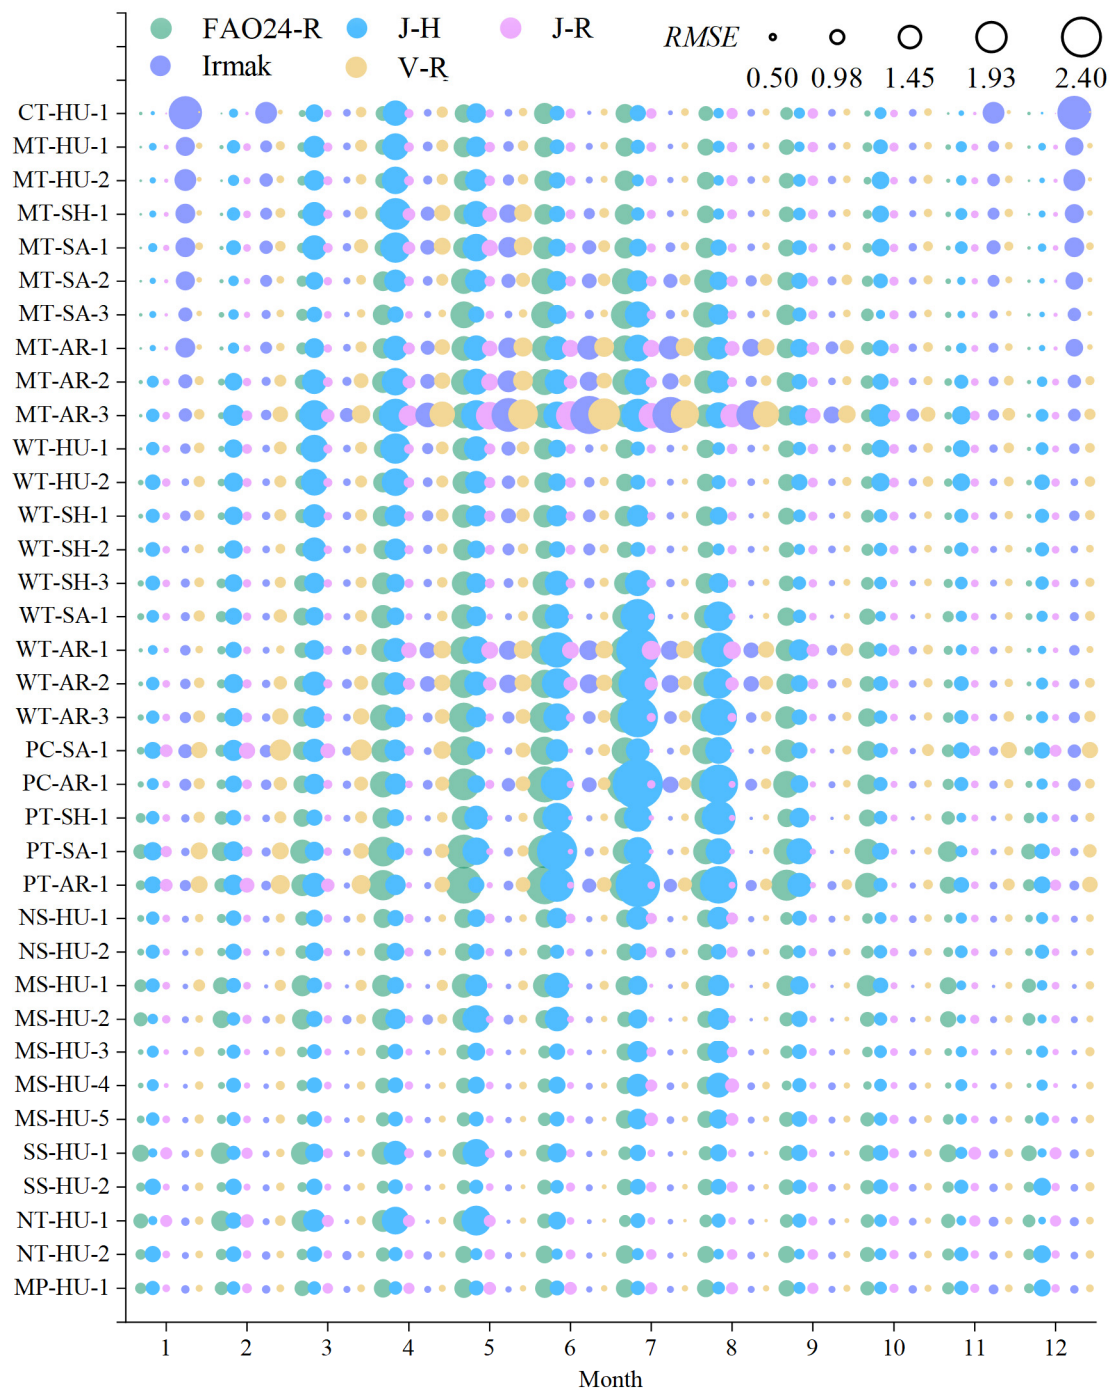

**Figure S6. Monthly variation of the mean root mean square error ( $RMSE$ ,  $\text{mm}\cdot\text{day}^{-1}$ ) values obtained using the five radiation-based reference evapotranspiration methods and the FAO56-PM method in the 36 agricultural zones.**

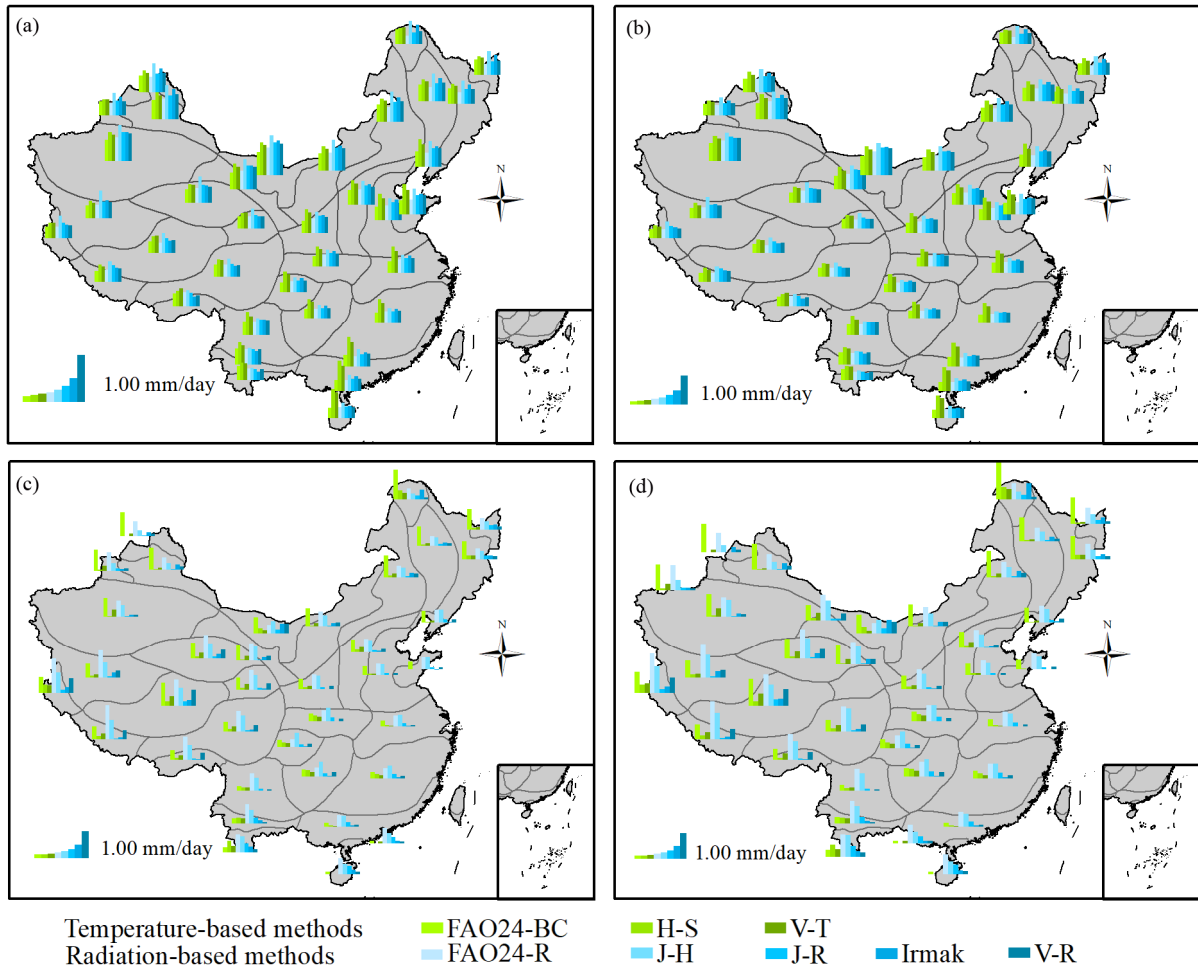

**Figure S7. Mean absolute error  $MAE$  (a) and root mean square error  $RMSE$  (b) obtained from the daily reference evapotranspiration calculated using the eight calibrated methods versus daily reference evapotranspiration calculated using the FAO56-PM method, the difference between the  $MAE$  (c) and  $RMSE$  (d) from the original methods minus those from the calibrated methods in 36 agricultural zones of China.**
